# Supplementary material for: High Temporal Variability in Late Blight Pathogen Diversity, Virulence, and Fungicide Resistance in Potato Breeding Fields: Results from a Long-Term Monitoring Study
Source: MDPI journal article supplement (doi:10.3390/plants11182426), 2022-09-16
Supplement: s1 [file s1]

## Supplementary Materials

**Supplementary Table S1.** Resistance to late blight on foliage.

| Cultivar/Breeding line | Cultivar resistance               | Number of isolates |
|------------------------|-----------------------------------|--------------------|
| Alpha                  | moderately resistant <sup>a</sup> | 2                  |
| Ambition               | susceptible <sup>b</sup>          | 1                  |
| Ando                   | resistant <sup>c</sup>            | 9                  |
| Anti                   | resistant                         | 32                 |
| Ants                   | resistant                         | 11                 |
| Arielle                | susceptible                       | 5                  |
| Asterix                | susceptible                       | 6                  |
| Berber                 | susceptible                       | 4                  |
| Bintje                 | susceptible                       | 3                  |
| Birgit                 | susceptible                       | 2                  |
| Certo                  | susceptible                       | 3                  |
| Danva                  | susceptible                       | 4                  |
| Evita                  | moderately resistant              | 1                  |
| Evolution              | susceptible                       | 1                  |
| Flavia                 | susceptible                       | 2                  |
| Folva                  | susceptible                       | 2                  |
| Fontane                | susceptible                       | 3                  |
| Fresco                 | susceptible                       | 1                  |
| Granola                | moderately resistant              | 2                  |
| Impala                 | moderately resistant              | 3                  |
| Juku                   | resistant                         | 5                  |
| Jõgeva kollane         | moderately resistant              | 3                  |
| Kuras                  | resistant                         | 7                  |
| Latona                 | moderately resistant              | 9                  |
| Maret                  | moderately resistant              | 7                  |
| Milva                  | moderately resistant              | 5                  |
| Ofelia                 | moderately resistant              | 1                  |
| Oleva                  | moderately resistant              | 6                  |
| Picasso                | moderately resistant              | 1                  |

|                                  |                      |    |
|----------------------------------|----------------------|----|
| Piret                            | resistant            | 6  |
| Platina                          | moderately resistant | 3  |
| Princess                         | susceptible          | 2  |
| Raja                             | moderately resistant | 1  |
| Red Lady                         | moderately resistant | 3  |
| Remarka                          | resistant            | 1  |
| Rosella                          | susceptible          | 4  |
| Sante                            | susceptible          | 3  |
| Sarme                            | resistant            | 13 |
| Satina                           | susceptible          | 5  |
| Sava                             | moderately resistant | 1  |
| Secura                           | susceptible          | 1  |
| Sinora                           | moderately resistant | 5  |
| Solist                           | susceptible          | 3  |
| Van Gogh                         | moderately resistant | 4  |
| Agrie dzeltenie/Varajane kollane | susceptible          | 4  |
| Victoria                         | moderately resistant | 2  |
| Vita                             | moderately resistant | 1  |
| 359                              | moderately resistant | 3  |
| 386                              | moderately resistant | 1  |
| 476                              | moderately resistant | 1  |
| 477                              | moderately resistant | 2  |
| 569                              | resistant            | 3  |
| 127-12                           | moderately resistant | 3  |
| 1370-94                          | moderately resistant | 2  |
| 1572-98                          | resistant            | 3  |
| 391-93                           | moderately resistant | 1  |
| 405-98                           | moderately resistant | 1  |
| 458-98                           | moderately resistant | 1  |
| 522-98                           | moderately resistant | 4  |
| 899-97                           | resistant            | 1  |
| 92-BVU-2                         | resistant            | 2  |
| 93-BXL-11                        | moderately resistant | 1  |

|           |           |   |
|-----------|-----------|---|
| 93-BXY-1  | resistant | 1 |
| R 1003-05 | resistant | 9 |
| R 1067-05 | resistant | 1 |
| R 3456-06 | resistant | 5 |
| R 437-98  | resistant | 1 |
| R 458-07  | resistant | 4 |
| R 989-93  | resistant | 2 |
| R 992-95  | resistant | 1 |

note - <sup>a</sup> susceptible (very low, very low to low, low); <sup>b</sup> moderately resistant (low to medium, medium, medium to high); <sup>c</sup> resistant (high, high to very high, very high)

**Supplementary Table S2.** Number of different pathotypes among isolates of *Phytophthora infestans* from potato breeding fields in Estonia (2001–2007, 2010–2014).

| Year of isolation | Pathotype             | Number of virulence factors | Number of isolates | Percentage |
|-------------------|-----------------------|-----------------------------|--------------------|------------|
| 2001              | 1.2.3.4.7.8.10.11     | 8                           | 5                  | 14         |
|                   | 1.2.3.4.6.7.8.9.10.11 | 10                          | 3                  | 8          |
|                   | 1.2.3.4.6.7.9.10.11   | 9                           | 3                  | 8          |
|                   | 1.2.3.4.7.10.11       | 7                           | 3                  | 8          |
|                   | 1.2.3.4.5.6.7.9.10.11 | 10                          | 2                  | 6          |
|                   | 1.2.3.4.6.7.10.11     | 8                           | 2                  | 6          |
|                   | 1.2.4.6.7.9.10.11     | 8                           | 2                  | 6          |
|                   | 1.3.4.6.7.8.10.11     | 8                           | 2                  | 6          |
|                   | 1.3.4.6.7.8.9.10.11   | 9                           | 2                  | 6          |
|                   | 1.3.4.7.8.10.11       | 7                           | 2                  | 6          |
|                   | Pathotypes found once |                             | 9                  | 26         |
| 2002              | 1.2.3.4.6.7.10.11     | 8                           | 3                  | 7          |
|                   | 1.2.3.4.6.7.8         | 7                           | 2                  | 5          |
|                   | 1.2.3.6.7.8.10.11     | 8                           | 2                  | 5          |
|                   | 1.3.4.6.7.10          | 6                           | 2                  | 5          |
|                   | 1.3.4.6.7.8.10        | 7                           | 2                  | 5          |
|                   | 1.3.4.6.7.8.10.11     | 8                           | 2                  | 5          |
|                   | 1.3.4.7               | 4                           | 2                  | 5          |
|                   | 1.3.4.7.10.11         | 6                           | 2                  | 5          |
|                   | 1.3.7.10              | 4                           | 2                  | 5          |
|                   | Pathotypes found once |                             | 22                 | 53         |

|      |                         |    |    |     |
|------|-------------------------|----|----|-----|
| 2003 | Pathotypes found once   |    | 14 | 100 |
| 2004 | 1.2.3.4.7.10.11         | 7  | 5  | 26  |
|      | 1.2.3.4.7.8.10.11       | 8  | 3  | 16  |
|      | 1.2.3.4.6.7.8.9.10.11   | 10 | 2  | 11  |
|      | Pathotypes found once   |    | 9  | 47  |
| 2005 | 1.2.3.4.5.6.7.10.11     | 9  | 4  | 22  |
|      | 1.2.3.4.5.6.7.8.9.10.11 | 11 | 3  | 17  |
|      | 1.2.3.4.6.7.8.10.11     | 9  | 3  | 17  |
|      | 1.2.3.4.5.7.8.10.11     | 9  | 2  | 11  |
|      | 1.2.3.4.6.7.10.11       | 8  | 2  | 11  |
|      | 1.2.3.4.7.8.10.11       | 8  | 2  | 11  |
|      | Pathotypes found once   |    | 2  | 11  |
| 2006 | 1.2.3.4.6.7.8.10.11     | 9  | 7  | 23  |
|      | 1.2.3.4.6.7.10.11       | 8  | 6  | 20  |
|      | 1.3.4.7.10.11           | 6  | 4  | 13  |
|      | 1.3.4.7.8.10.11         | 7  | 2  | 7   |
|      | 1.4.7.10.11             | 5  | 2  | 7   |
|      | Pathotypes found once   |    | 9  | 30  |
| 2007 | 1.2.3.4.7.8.10.11       | 8  | 6  | 26  |
|      | 1.2.3.4.7.10.11         | 7  | 4  | 17  |
|      | 1.2.3.4.6.7.10.11       | 8  | 3  | 13  |
|      | 1.2.3.4.5.6.7.10.11     | 9  | 2  | 9   |
|      | 1.2.3.4.6.7.8.10.11     | 9  | 2  | 9   |
|      | Pathotypes found once   |    | 6  | 26  |
| 2010 | 2.3.7                   | 3  | 2  | 18  |
|      | Pathotypes found once   |    | 9  | 82  |
| 2011 | 1.2.3.4.6.7.10.11       | 8  | 6  | 29  |
|      | 1.2.3.4.7.10.11         | 7  | 3  | 14  |
|      | Pathotypes found once   |    | 12 | 57  |

|       |                       |   |   |    |
|-------|-----------------------|---|---|----|
| 2012  | 1.2.3.4.6.7.10.11     | 8 | 7 | 47 |
|       | 1.2.3.4.7.10.11       | 7 | 2 | 13 |
|       | 2.7.11                | 3 | 2 | 13 |
|       | Pathotypes found once |   | 4 | 27 |
| <hr/> |                       |   |   |    |
| 2013  | 1.2.3.4.7.8.10.11     | 8 | 7 | 58 |
|       | 1.2.3.4.6.7.8.10.11   | 9 | 3 | 25 |
|       | Pathotypes found once |   | 2 | 17 |
|       |                       |   |   |    |
| <hr/> |                       |   |   |    |
| 2014  | 1.2.3.4.7.10.11       | 7 | 5 | 42 |
|       | 1.2.3.4.7.8.10.11     | 8 | 3 | 25 |
|       | 1.3.4.7.10.11         | 6 | 2 | 17 |
|       | Pathotypes found once |   | 2 | 17 |
| <hr/> |                       |   |   |    |

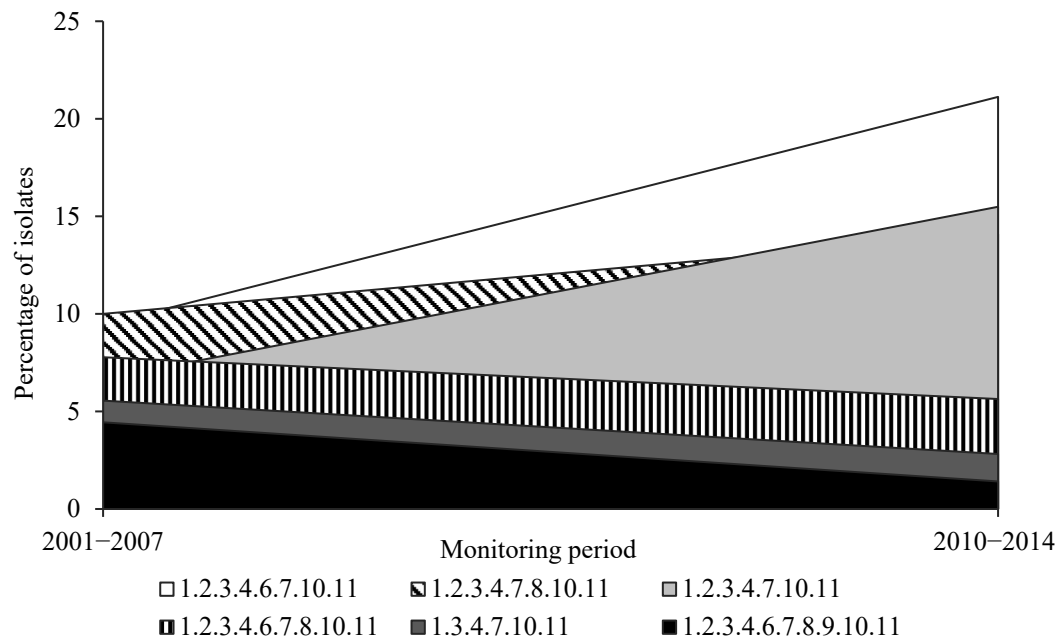

**Supplementary Figure S1.** Changes in the prevalence of six most common virulence races in *Phytophthora infestans* populations collected from Estonian potato breeding fields over the study period 2001–2014.

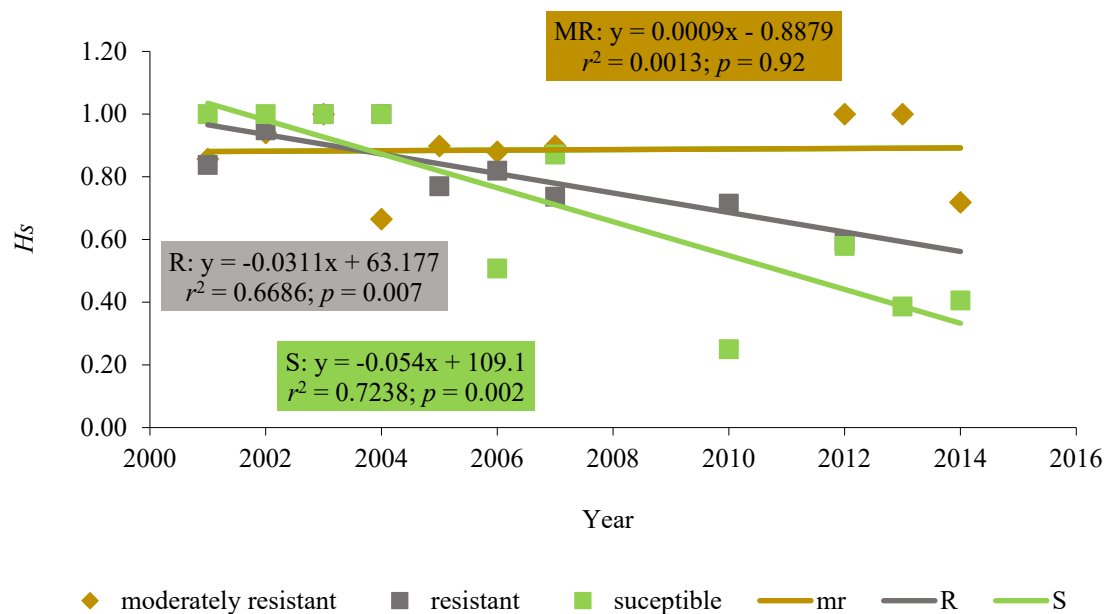

**Supplementary Figure S2.** Correlations of racial diversity of *P. infestans* isolates and late blight resistance category of potato cultivar in potato breeding fields in Estonia for 2001–2014. Data were fitted by linear regressions.
